# Supplementary material for: Alterations in microRNA Expression during Hematopoietic Stem Cell Mobilization
Source: MDPI journal article supplement (doi:10.3390/biology10070668), 2021-07-15
Supplement: s1 [file s1]

**Table S1.** Clinical characteristics of the patients enrolled in the study along with the RQ level of miRNAs determined in patients on day 0 and day A.

| Patient number | Sex | Age | Diagnosis | Response<br>1 – CR, 0 – not CR | Number of apheresis | Number of CD34+ cells on day A | CD34+/ $\mu$ l peak in peripheral blood on day A | Total number of collected CD34+ cells | WBC [ $\times 10^9$ / $\mu$ l] in peripheral blood at day A | RQ level on Day 0 |          |           |            |           |           |           | RQ level on Day A |          |           |            |            |           |           |
|----------------|-----|-----|-----------|--------------------------------|---------------------|--------------------------------|--------------------------------------------------|---------------------------------------|-------------------------------------------------------------|-------------------|----------|-----------|------------|-----------|-----------|-----------|-------------------|----------|-----------|------------|------------|-----------|-----------|
|                |     |     |           |                                |                     |                                |                                                  |                                       |                                                             | miRNA-15a         | miRNA-16 | miRNA-126 | miRNA-146a | miRNA-223 | miRNA-34a | miRNA-155 | miRNA-15a         | miRNA-16 | miRNA-126 | miRNA-146a | miRNA-223  | miRNA-34a | miRNA-155 |
| 1              | M   | 62  | MM        | CR                             | 1                   | 7.1                            | 115.4                                            | 7.1                                   | 20.39                                                       | 4.817             | 1.371    | 1.233     | 4.024      | 6.231     | 1.053     | 1.438     | 3.688             | 2.308    | 1.832     | 1.357      | 7.667      | 4.585     | 1.141     |
| 2              | F   | 57  | MM        | CR                             | 3                   | 0.9                            | 12.3                                             | 3.05                                  | 33.36                                                       | 4.925             | 0.881    | 1.491     | 2.115      | 1.949     | 1.433     | 0.909     | 18.34             | 2.472    | 4.028     | 8.021      | 32.41<br>4 | 0.49      | 0.131     |
| 3              | M   | 65  | MM        | CR                             | 1                   | 4.97                           | 103.2                                            | 4.97                                  | 23.3                                                        | 37.487            | 2.036    | 5.436     | 9.147      | 12.945    | 2.286     | 1.344     | 14.48<br>3        | 1.621    | 3.986     | 5.976      | 15.93<br>3 | 5.868     | 0.343     |
| 4              | M   | 63  | MM        | CR                             | 4                   | 0.32                           | 5.5                                              | 2.5                                   | 27.31                                                       | 4.501             | 0.64     | 1.165     | 1.518      | 1.131     | 0.654     | 0.508     | 12.54<br>8        | 1.262    | 3.855     | 3.978      | 11.66<br>1 | 2.239     | 0.457     |
| 5              | M   | 48  | MM        | CR                             | 1                   | 7.27                           | 94                                               | 7.27                                  | 9.4                                                         | 15.576            | 2.086    | 3.241     | 6.031      | 8.882     | 0.986     | 0.539     | 4.688             | 1.497    | 1.126     | 1.061      | 3.195      | 2.615     | 0.891     |
| 6              | F   | 51  | MM        | CR                             | 1                   | 4.25                           | 56.8                                             | 4.25                                  | 17.64                                                       | 39.807            | 8.742    | 7.489     | 13.156     | 25.455    | 3.068     | 1.47      | 13.51             | 3.349    | 3.948     | 2.793      | 15.43<br>8 | 2.917     | 1.271     |
| 7              | M   | 60  | MM        | CR                             | 1                   | 10.8                           | 88.8                                             | 10.8                                  | 14.85                                                       | 15.517            | 5.204    | 2.057     | 3.774      | 6.511     | 0.662     | 1.201     | 18.38<br>1        | 2.829    | 5.561     | 7.673      | 19.64<br>4 | 3.267     | 0.814     |
| 8              | F   | 61  | MM        | not CR<br>(VGPR)               | 2                   | 3.2                            | 58.4                                             | 5.58                                  | 17.04                                                       | 3.166             | 2.791    | 1.176     | 0.862      | 1.34      | 1.26      | 1.687     | 9.076             | 5.205    | 7.258     | 4.265      | 18.16<br>5 | 5.552     | 1.787     |
| 9              | F   | 65  | MM        | not CR<br>(VGPR)               | 2                   | 1.5                            | 25.3                                             | 2.91                                  | 13.44                                                       | 38.442            | 10.066   | 6.072     | 12.672     | 27.48     | 1.909     | 1.195     | 29.21<br>6        | 9.259    | 5.751     | 9.432      | 55.83<br>9 | 2.777     | 0.664     |
| 10             | M   | 67  | MM        | not CR<br>(VGPR)               | 6                   | 0.82                           | 7.4                                              | 2.99                                  | 30.85                                                       | 6.772             | 2.126    | 0.94      | 3.531      | 3.689     | 0.042     | 0.466     | 21.16<br>8        | 2.435    | 4.849     | 12.42<br>1 | 28.39<br>4 | 3.251     | 0.977     |

|    |   |    |    |                  |   |      |       |       |       |        |        |            |        |        |       |       |            |       |       |       |            |            |       |
|----|---|----|----|------------------|---|------|-------|-------|-------|--------|--------|------------|--------|--------|-------|-------|------------|-------|-------|-------|------------|------------|-------|
| 11 | F | 54 | MM | not CR<br>(VGPR) | 2 | 1.7  | 24.2  | 24.3  | 3.16  | 43.348 | 7.133  | 8.071      | 19.123 | 29.673 | 4.774 | 0.988 | 12.38<br>7 | 4.26  | 4.287 | 4.012 | 8.658      | 6.106      | 0.87  |
| 12 | F | 39 | MM | not CR<br>(VGPR) | 2 | 2.7  | 26.5  | 5.88  | 7.71  | 41.216 | 11.596 | 7.975      | 13.775 | 36.867 | 3.153 | 1.35  | 14.41<br>1 | 7.388 | 3.153 | 4.567 | 17.45      | 16.21<br>1 | 0.97  |
| 13 | F | 51 | MM | not CR<br>(VGPR) | 1 | 4.52 | 132.2 | 4.52  | 26.28 | 6.197  | 5.856  | 0.917      | 0.878  | 1.272  | 2.564 | 1.053 | 14.35<br>4 | 1.938 | 2.853 | 5.327 | 19.39<br>3 | 5.821      | 0.767 |
| 14 | F | 57 | MM | not CR<br>(VGPR) | 1 | 4.77 | 44.3  | 4.77  | 14.48 | 1.845  | 1.303  | 0.636      | 0.943  | 0.895  | 1.463 | 0.632 | 8.247      | 1.444 | 1.68  | 4.965 | 16.56<br>4 | 5.171      | 0.416 |
| 15 | M | 65 | MM | not CR<br>(VGPR) | 2 | 4.59 | 59.3  | 11.58 | 9.83  | 3.4    | 2.424  | 0.457      | 0.399  | 0.69   | 1.139 | 0.392 | 11.18<br>2 | 4.349 | 1.872 | 2.711 | 7.578      | 4.312      | 0.523 |
| 16 | F | 62 | MM | not CR<br>(VGPR) | 1 | 8.7  | 109.7 | 8.7   | 26.63 | 77.243 | 16.525 | 10.54<br>2 | 36.965 | 77.805 | 5.13  | 0.95  | 10.73<br>1 | 7.096 | 2.835 | 4.26  | 12.61<br>9 | 3.914      | 0.713 |
| 17 | F | 69 | MM | not CR<br>(VGPR) | 1 | 6.1  | 91.2  | 6.1   | 20.78 | 37.867 | 3.233  | 5.99       | 18.141 | 24.861 | 1.21  | 0.423 | 5.956      | 6.366 | 4.009 | 5.2   | 18.83<br>8 | 4.044      | 0.309 |
| 18 | F | 42 | MM | not CR<br>(VGPR) | 3 | 1.15 | 11.34 | 4.5   | 6.75  | 48.638 | 2.346  | 7.307      | 18.301 | 23.236 | 1.766 | 1.236 | 9.775      | 2.101 | 3.802 | 6.171 | 12.73<br>2 | 2.952      | 0.615 |
| 19 | M | 63 | MM | not CR<br>(VGPR) | 1 | 13.5 | 179.3 | 13.5  | 17.19 | 18.819 | 1.449  | 3.672      | 7.021  | 13.142 | 1.395 | 1.012 | 13.48<br>5 | 1.307 | 4.334 | 4.65  | 16.52<br>2 | 6.26       | 0.565 |
| 20 | M | 50 | MM | not CR<br>(VGPR) | 2 | 2.49 | 89.9  | 5.29  | 18.82 | 22.114 | 9.339  | 3.087      | 4.919  | 8.039  | 1.959 | 0.262 | 8.632      | 1.561 | 3.073 | 2.801 | 13.05<br>6 | 5.704      | 0.462 |
| 21 | F | 51 | MM | not CR<br>(VGPR) | 4 | 0.3  | 5.1   | 2.66  | 21.99 | 8.741  | 2.991  | 2.745      | 12.393 | 8.034  | 0.535 | 0.514 | 10.79      | 0.941 | 2.871 | 5.793 | 10.31<br>2 | 0.483      | 0.635 |
| 22 | M | 60 | MM | not CR<br>(VGPR) | 1 | 3.5  | 51.9  | 3.5   | 16.56 | 68.182 | 7.078  | 14.28      | 47.676 | 61.797 | 4.838 | 0.713 | 9.955      | 2.125 | 2.999 | 4.631 | 12.51<br>5 | 2.945      | 0.695 |
| 23 | M | 60 | MM | not CR<br>(VGPR) | 1 | 20.8 | 415.4 | 20.8  | 14.45 | 21.62  | 2.634  | 9.606      | 30.81  | 43.928 | 1.06  | 0.249 | 11.84<br>1 | 1.474 | 3.322 | 4.01  | 12.63<br>8 | 2.813      | 0.613 |
| 24 | M | 55 | MM | not CR<br>(VGPR) | 1 | 5.69 | 143.5 | 5.69  | 10.93 | 42.359 | 4.212  | 8.132      | 19.106 | 25.865 | 1.257 | 0.971 | 1.237      | 0.519 | 2.168 | 3.7   | 4.047      | 0.814      | 0.439 |
| 25 | M | 50 | MM | not CR<br>(VGPR) | 1 | 21   | 449.5 | 21    | 9.79  | 53.106 | 3.48   | 10.14<br>9 | 40.938 | 46.566 | 1.611 | 0.597 | 6.036      | 1.079 | 1.777 | 2.456 | 4.858      | 2.326      | 0.7   |

|    |   |    |         |                  |   |      |       |      |       |         |        |            |        |         |       |       |            |            |       |            |            |            |       |
|----|---|----|---------|------------------|---|------|-------|------|-------|---------|--------|------------|--------|---------|-------|-------|------------|------------|-------|------------|------------|------------|-------|
| 26 | F | 63 | MM      | not CR<br>(VGPR) | 4 | 0.6  | 4.8   | 2.2  | 14.35 | 11.258  | 2.22   | 2.312      | 8.66   | 4.762   | 2.719 | 0.848 | 16.96<br>8 | 2.465      | 5.073 | 7.167      | 16.86<br>6 | 3.984      | 0.926 |
| 27 | F | 62 | MM      | not CR<br>(VGPR) | 4 | 0.78 | 11.9  | 3.1  | 15.65 | 31.242  | 4.399  | 5.583      | 10.002 | 15.391  | 2.121 | 1.267 | 20.87<br>9 | 3.554      | 5.338 | 7.4        | 23.07<br>3 | 3.288      | 0.792 |
| 28 | F | 60 | MM      | not CR<br>(VGPR) | 3 | 0.46 | 7.59  | 3.6  | 22.33 | 22.545  | 2.482  | 5.005      | 14.43  | 22.044  | 1.061 | 0.734 | 22.05<br>2 | 2.147      | 6.202 | 7.975      | 31.78<br>6 | 2.104      | 0.637 |
| 29 | F | 65 | MM      | not CR<br>(VGPR) | 5 | 0.49 | 6.9   | 2.72 | 7.34  | 156.829 | 10.713 | 20.38      | 46.847 | 105.312 | 4.966 | 0.981 | 23.30<br>4 | 6.582      | 4.416 | 7.105      | 18.78<br>6 | 7.985      | 1.982 |
| 30 | F | 62 | MM      | not CR<br>(VGPR) | 1 | 7.5  | 130.4 | 7.5  | 47.42 | 1       | 1      | 1          | 1      | 1       | 1     | 1     | 2.387      | 0.648      | 1.761 | 1.122      | 9.479      | 2.045      | 1.258 |
| 31 | F | 60 | MM      | not CR<br>(VGPR) | 1 | 5.3  | 71.5  | 5.3  | 19.44 | 25.037  | 6.606  | 5.686      | 10.132 | 14.393  | 2.445 | 1.285 | 16.92<br>8 | 2.133      | 5.491 | 6.204      | 23.18<br>3 | 6.068      | 0.821 |
| 32 | F | 55 | MM      | not CR<br>(PR)   | 2 | 0.9  | 14.3  | 3.42 | 4.13  | 23.915  | 3.676  | 2.89       | 12.752 | 14.619  | 0.844 | 0.708 | 15.30<br>3 | 6.385      | 4.007 | 10.20<br>1 | 21.54<br>5 | 18.77<br>8 | 0.472 |
| 33 | M | 40 | MM      | not CR<br>(PR)   | 1 | 4.7  | 62.6  | 4.7  | 12.6  | 16.646  | 7.874  | 4.003      | 4.805  | 13.367  | 2.128 | 1.127 | 18.53<br>6 | 16.31<br>2 | 4.579 | 3.592      | 25.08<br>5 | 13.39<br>1 | 0.647 |
| 34 | M | 56 | MM      | not CR<br>(PR)   | 2 | 2.62 | 27.6  | 4.46 | 28.77 | 49.926  | 11.175 | 7.516      | 13.743 | 38.17   | 2.591 | 0.791 | 33.23<br>7 | 19.07<br>3 | 5.791 | 6.213      | 33.38<br>5 | 4.82       | 1.017 |
| 35 | M | 60 | MM      | not CR<br>(PR)   | 1 | 6.47 | 153.6 | 6.47 | 2.68  | 22.408  | 2.078  | 5.712      | 15.418 | 17.117  | 1.934 | 0.636 | 10.23<br>2 | 1.993      | 2.708 | 5.066      | 9.723      | 4.868      | 0.67  |
| 36 | M | 44 | MM      | not CR<br>(PR)   | 2 | 1.79 | 16.6  | 3.02 | 4.69  | 40.146  | 3.107  | 6.506      | 19.159 | 16.49   | 1.752 | 0.913 | 12.79      | 1.128      | 3.998 | 5.668      | 9.148      | 3.03       | 0.79  |
| 37 | M | 63 | MM      | not CR<br>(PR)   | 1 | 5.8  | 95.6  | 5.8  | 3.4   | 9.302   | 1.839  | 2.165      | 9.191  | 11.156  | 1.734 | 0.156 | 1.923      | 0.603      | 0.688 | 1.485      | 1.897      | 2.551      | 0.242 |
| 38 | M | 64 | MM      | not CR<br>(PR)   | 2 | 1.2  | 18    | 8.15 | 8.76  | 27.533  | 2.823  | 5.578      | 19.567 | 19.17   | 2.185 | 0.676 | 6.56       | 1.295      | 1.779 | 0.163      | 6.005      | 3.396      | 0.518 |
| 39 | M | 36 | MM      | not CR<br>(PR)   | 1 | 8.2  | 84.2  | 8.2  | 6.16  | 77.573  | 5.759  | 17.69<br>6 | 49.592 | 58.687  | 1.676 | 0.866 | 21.03<br>1 | 2.24       | 4.603 | 8.035      | 16.44<br>3 | 3.604      | 0.369 |
| 40 | M | 54 | NH<br>L | CR               | 3 | 1.14 | 24.5  | 3.36 | 21.89 | 18.593  | 5.053  | 3.469      | 4.895  | 11.515  | 1.34  | 0.556 | 7.062      | 1.352      | 2.059 | 2.111      | 11.22<br>9 | 5.583      | 0.643 |

|    |   |    |                            |                |   |      |       |      |       |        |        |       |        |        |       |       |            |       |       |       |            |            |       |
|----|---|----|----------------------------|----------------|---|------|-------|------|-------|--------|--------|-------|--------|--------|-------|-------|------------|-------|-------|-------|------------|------------|-------|
|    |   |    | (M<br>CL)                  |                |   |      |       |      |       |        |        |       |        |        |       |       |            |       |       |       |            |            |       |
| 41 | F | 60 | NH<br>L<br>(M<br>CL)       | CR             | 2 | 6.7  | 156.9 | 10.6 | 30.34 | 33.839 | 12.738 | 5.945 | 10.713 | 34.125 | 3.383 | 1.257 | 17.55<br>6 | 3.443 | 3.787 | 4.828 | 25.49<br>6 | 7.083      | 1.126 |
| 42 | M | 53 | NH<br>L<br>(DL<br>BCL<br>) | CR             | 1 | 3.9  | 79.4  | 3.9  | 14.34 | 9.533  | 1.778  | 2.056 | 8.17   | 6.046  | 1.051 | 0.643 | 8.312      | 1.215 | 3.192 | 3.313 | 10.30<br>9 | 4.24       | 0.522 |
| 43 | F | 62 | NH<br>L<br>(DL<br>BCL<br>) | not CR<br>(PR) | 2 | 2.6  | 46.5  | 4.42 | 37.85 | 15.784 | 1.536  | 3.401 | 12.105 | 13.714 | 3.024 | 0.738 | 24.14<br>2 | 2.78  | 4.569 | 3.853 | 37.09<br>8 | 7.556      | 0.643 |
| 44 | M | 59 | NH<br>L<br>(DL<br>BCL<br>) | not CR<br>(PR) | 2 | 1.68 | 27.18 | 4.98 | 16.78 | 21.717 | 1.783  | 6.088 | 13.227 | 15.486 | 2.696 | 0.622 | 13.37<br>9 | 1.174 | 2.681 | 5.764 | 9.983      | 2.367      | 0.324 |
| 45 | F | 42 | NH<br>L<br>(HS<br>TL)      | not CR<br>(PR) | 3 | 1.85 | 21.1  | 3.59 | 40.5  | 14.781 | 1.622  | 2.475 | 6.088  | 9.901  | 0.949 | 0.323 | 25.58<br>3 | 2.65  | 8.15  | 8.539 | 25.34<br>8 | 8.586      | 0.824 |
| 46 | F | 60 | NH<br>L<br>(AL<br>CL)      | not CR<br>(PR) | 2 | 1.65 | 29.6  | 5.43 | 11.25 | 10.582 | 0.7    | 1.678 | 4.612  | 6.134  | 0.612 | 0.182 | 5.292      | 0.903 | 1.611 | 3.045 | 4.729      | 0.972      | 0.585 |
| 47 | F | 38 | HL                         | CR             | 2 | 2.8  | 29.5  | 4.33 | 29.8  | 19.13  | 3.742  | 4.073 | 8.283  | 14.841 | 1.795 | 0.751 | 12.11<br>1 | 1.366 | 2.926 | 3.172 | 14.30<br>4 | 1.48       | 0.354 |
| 48 | M | 49 | HL                         | not CR<br>(PR) | 2 | 2.26 | 22.5  | 5.16 | 33.16 | 12.914 | 3.06   | 2.606 | 3.555  | 8.866  | 1.496 | 0.908 | 6.648      | 0.68  | 1.958 | 1.89  | 4.012      | 1.812      | 0.934 |
| 49 | F | 34 | HL                         | not CR<br>(PR) | 2 | 2.3  | 50.5  | 5.9  | 8.08  | 29.767 | 2.342  | 4.707 | 15.221 | 24.319 | 2.592 | 0.501 | 27.94<br>8 | 3.574 | 5.329 | 9.26  | 24.41<br>2 | 12.37<br>6 | 0.679 |

|    |   |    |    |                |   |      |       |      |       |         |       |            |        |        |       |       |            |       |            |       |            |       |       |
|----|---|----|----|----------------|---|------|-------|------|-------|---------|-------|------------|--------|--------|-------|-------|------------|-------|------------|-------|------------|-------|-------|
| 50 | M | 21 | HL | not CR<br>(PR) | 1 | 12.2 | 205.5 | 12.2 | 42.73 | 119.217 | 8.908 | 16.95<br>8 | 31.423 | 79.905 | 3.762 | 0.804 | 50.35<br>1 | 6.079 | 10.89<br>6 | 6.551 | 42.98<br>4 | 7.977 | 0.531 |
|----|---|----|----|----------------|---|------|-------|------|-------|---------|-------|------------|--------|--------|-------|-------|------------|-------|------------|-------|------------|-------|-------|

**Table S2.** The comparison of the total number of CD34+ cells collected after mobilization. number of cells collected at first apheresis. and CD34+ peak in peripheral blood at miRNAs “increase” and “decrease” expression groups from Day 0 to day A.

| miRNA           | Total number of CD34+ cells collected after mobilization [x10 <sup>6</sup> /kg] |                |          | Number of collected CD34+ on Day A [x10 <sup>6</sup> /kg] |                |          | Number of CD34+ cells in peripheral blood on Day A [cells/ $\mu$ L] |                |          |
|-----------------|---------------------------------------------------------------------------------|----------------|----------|-----------------------------------------------------------|----------------|----------|---------------------------------------------------------------------|----------------|----------|
|                 | Increase group                                                                  | Decrease group | p        | Increase group                                            | Decrease group | p        | Increase group                                                      | Decrease group | p        |
| hsa-miR-15a-5p  | Me = 4.41                                                                       | Me = 5.22      | P = 0.08 | Me = 2.88                                                 | M = 3.11       | P = 0.26 | Me = 43.55                                                          | Me = 52.11     | P = 0.13 |
| hsa-miR-16-5p   | Me = 4.73                                                                       | M = 5.10       | P = 0.38 | Me = 2.30                                                 | M = 3.86       | P = 0.17 | Me = 43.55                                                          | Me = 62.25     | P = 0.17 |
| hsa-miR-126-3p  | Me = 4.48                                                                       | Me = 5.29      | P = 0.13 | Me = 2.88                                                 | Me = 3.11      | P = 0.27 | Me = 46.37                                                          | Me = 53.58     | P = 0.22 |
| hsa-miR-146a-5p | Me = 4.60                                                                       | Me = 5.16      | P = 0.57 | Me = 3.85                                                 | Me = 2.76      | P = 0.80 | Me = 50.76                                                          | Me = 52.11     | P = 0.54 |
| hsa-miR-155-5p  | Me = 5.41                                                                       | Me = 4.66      | P = 0.60 | Me = 2.48                                                 | Me = 3.68      | P = 0.99 | Me = 55.04                                                          | Me = 49.30     | P = 0.79 |
